# Supplementary material for: Executive Function among Chilean Shellfish Divers: A Cross-Sectional Study Considering Working and Health Conditions in Artisanal Fishing
Source: Int J Environ Res Public Health. 2021 May 31;18(11):5923. doi: 10.3390/ijerph18115923 (PMC8199200; doi:10.3390/ijerph18115923)
Supplement: Supplementary file 1 [file ijerph-18-05923-s001.zip › Table S1.pdf]

**Table S1: Decompression illness scores according to frequency and severity.**

| Severity                                                  | Frequency |                    |               | Replacement       | Total |
|-----------------------------------------------------------|-----------|--------------------|---------------|-------------------|-------|
|                                                           | Never     | Once in a lifetime | Several times | Medical diagnosis |       |
| Mild symptoms <sup>1</sup> (x1)                           | 0         | 1                  | 2             | 3                 |       |
| Neurological decompression sickness <sup>2</sup> (sum x2) | 0         | 1                  | 2             | 3                 |       |
| Cerebral arterial gas embolism <sup>3</sup> (sum x3)      | 0         | 1                  | 2             | 3                 |       |

<sup>1</sup> Specific symptoms of decompression sickness type 1 (in the former nomenclature) that is joint pain and skin alterations [12]. <sup>2</sup> Manifestations that could be more related to peripheral nerve and spinal cord involvement (regardless of their severity) [12]. <sup>3</sup> Considered when the diver had brain involvement after diving, with manifestations such as unconsciousness or seizures [12].

#### **Example of application**

A diver reported having suffered several episodes of mild decompression illness during his working life – non-diagnosed in a health center. In addition, he once experienced neurological decompression sickness, which was diagnosed in the local hospital. His history of decompression illness score is 8.

| Severity                                     | Frequency     |                    |               | Replacement       | Total    |
|----------------------------------------------|---------------|--------------------|---------------|-------------------|----------|
|                                              | Never         | Once in a lifetime | Several times | Medical diagnosis |          |
| Mild symptoms (x1)                           | 0             | 1                  | <b>2 (x1)</b> | 3                 | <b>2</b> |
| Neurological decompression sickness (sum x2) | 0             | <b>1</b>           | 2             | <b>3 (x2)</b>     | <b>6</b> |
| Cerebral arterial gas embolism (sum x3)      | <b>0 (x3)</b> | 1                  | 2             | 3                 | <b>0</b> |
|                                              |               |                    |               |                   | <b>8</b> |
