# Supplementary material for: Executive Function among Chilean Shellfish Divers: A Cross-Sectional Study Considering Working and Health Conditions in Artisanal Fishing
Source: Int J Environ Res Public Health. 2021 May 31;18(11):5923. doi: 10.3390/ijerph18115923 (PMC8199200; doi:10.3390/ijerph18115923)
Supplement: Supplementary file 1 [file ijerph-18-05923-s001.zip › Table S2.pdf]

**Table S2: Additional test statistics of the linear regression models (Table 3)**

**1) Percentage of perseverative responses**

| Model Summary |                   |          |                   |                            |                 |          |     |     |               |
|---------------|-------------------|----------|-------------------|----------------------------|-----------------|----------|-----|-----|---------------|
| Model         | R                 | R Square | Adjusted R Square | Std. Error of the Estimate | R Square Change | F Change | df1 | df2 | Sig. F Change |
| 1             | ,420 <sup>a</sup> | ,177     | ,134              | 24,449                     | ,177            | 4,159    | 5   | 97  | ,002          |

a. Predictors: (Constant), History of decompression illness score, dAge 40-49 years, Hazardous alcohol consumption, Depressive symptoms, dAge 50-59 years

| ANOVA <sup>a</sup> |            |                |     |             |       |                   |
|--------------------|------------|----------------|-----|-------------|-------|-------------------|
| Model              |            | Sum of Squares | df  | Mean Square | F     | Sig.              |
| 1                  | Regression | 12429,274      | 5   | 2485,855    | 4,159 | ,002 <sup>b</sup> |
|                    | Residual   | 57983,581      | 97  | 597,769     |       |                   |
|                    | Total      | 70412,854      | 102 |             |       |                   |

a. Dependent Variable: Percentage of perseverative responses

b. Predictors: (Constant), History of decompression illness score, dAge 40-49 years, Hazardous alcohol consumption, Depressive symptoms, dAge 50-59 years

| Coefficients <sup>a</sup> |                                        |                             |            |                           |       |      |                                 |             |                         |       |
|---------------------------|----------------------------------------|-----------------------------|------------|---------------------------|-------|------|---------------------------------|-------------|-------------------------|-------|
| Model                     |                                        | Unstandardized Coefficients |            | Standardized Coefficients | t     | Sig. | 95,0% Confidence Interval for B |             | Collinearity Statistics |       |
|                           |                                        | B                           | Std. Error | Beta                      |       |      | Lower Bound                     | Upper Bound | Tolerance               | VIF   |
| 1                         | (Constant)                             | 13,972                      | 5,422      |                           | 2,577 | ,011 | 3,210                           | 24,733      |                         |       |
|                           | dAge 40-49 years                       | 12,949                      | 6,523      | ,240                      | 1,985 | ,050 | ,004                            | 25,895      | ,580                    | 1,725 |
|                           | dAge 50-59 years                       | 14,749                      | 6,755      | ,274                      | 2,183 | ,031 | 1,341                           | 28,156      | ,541                    | 1,850 |
|                           | Depressive symptoms                    | 11,184                      | 8,746      | ,121                      | 1,279 | ,204 | -6,174                          | 28,542      | ,951                    | 1,051 |
|                           | Hazardous alcohol consumption          | 3,450                       | 5,168      | ,063                      | ,668  | ,506 | -6,807                          | 13,708      | ,969                    | 1,033 |
|                           | History of decompression illness score | 1,252                       | ,529       | ,235                      | 2,368 | ,020 | ,202                            | 2,301       | ,858                    | 1,165 |

a. Dependent Variable: Percentage of perseverative responses

## 2) Percentage of perseverative errors

**Model Summary**

| Model | R                 | R Square | Adjusted R Square | Std. Error of the Estimate | Change Statistics |          |     |     | Sig. F Change |
|-------|-------------------|----------|-------------------|----------------------------|-------------------|----------|-----|-----|---------------|
|       |                   |          |                   |                            | R Square Change   | F Change | df1 | df2 |               |
| 1     | ,418 <sup>a</sup> | ,174     | ,132              | 17,785                     | ,174              | 4,099    | 5   | 97  | ,002          |

a. Predictors: (Constant), History of decompression illness score, dAge 40-49 years, Hazardous alcohol consumption, Depressive symptoms, dAge 50-59 years

**ANOVA<sup>a</sup>**

| Model |            | Sum of Squares | df  | Mean Square | F     | Sig.              |
|-------|------------|----------------|-----|-------------|-------|-------------------|
| 1     | Regression | 6482,040       | 5   | 1296,408    | 4,099 | ,002 <sup>b</sup> |
|       | Residual   | 30681,300      | 97  | 316,302     |       |                   |
|       | Total      | 37163,340      | 102 |             |       |                   |

a. Dependent Variable: Percentage of perseverative errors

b. Predictors: (Constant), History of decompression illness score, dAge 40-49 years, Hazardous alcohol consumption, Depressive symptoms, dAge 50-59 years

**Coefficients<sup>a</sup>**

| Model |                                        | Unstandardized Coefficients |            | Standardized Coefficients | t     | Sig. | 95,0% Confidence Interval for B |             | Collinearity Statistics |       |
|-------|----------------------------------------|-----------------------------|------------|---------------------------|-------|------|---------------------------------|-------------|-------------------------|-------|
|       |                                        | B                           | Std. Error | Beta                      |       |      | Lower Bound                     | Upper Bound | Tolerance               | VIF   |
| 1     | (Constant)                             | 13,182                      | 3,944      |                           | 3,342 | ,001 | 5,354                           | 21,010      |                         |       |
|       | dAge 40-49 years                       | 10,057                      | 4,745      | ,257                      | 2,120 | ,037 | ,640                            | 19,474      | ,580                    | 1,725 |
|       | dAge 50-59 years                       | 10,974                      | 4,914      | ,280                      | 2,233 | ,028 | 1,221                           | 20,727      | ,541                    | 1,850 |
|       | Depressive symptoms                    | 7,736                       | 6,362      | ,115                      | 1,216 | ,227 | -4,890                          | 20,363      | ,951                    | 1,051 |
|       | Hazardous alcohol consumption          | 2,430                       | 3,759      | ,061                      | ,646  | ,520 | -5,032                          | 9,891       | ,969                    | 1,033 |
|       | History of decompression illness score | ,881                        | ,385       | ,228                      | 2,290 | ,024 | ,118                            | 1,644       | ,858                    | 1,165 |

a. Dependent Variable: Percentage of perseverative errors

### 3) Percentage of non-perseverative errors

**Model Summary**

| Model | R                 | R Square | Adjusted R Square | Std. Error of the Estimate | R Square Change | Change Statistics |     |     | Sig. F Change |
|-------|-------------------|----------|-------------------|----------------------------|-----------------|-------------------|-----|-----|---------------|
|       |                   |          |                   |                            |                 | F Change          | df1 | df2 |               |
| 1     | ,248 <sup>a</sup> | ,061     | ,013              | 12,728                     | ,061            | 1,269             | 5   | 97  | ,284          |

a. Predictors: (Constant), History of decompression illness score, dAge 40-49 years, Hazardous alcohol consumption, Depressive symptoms, dAge 50-59 years

**ANOVA<sup>a</sup>**

| Model |            | Sum of Squares | df  | Mean Square | F     | Sig.              |
|-------|------------|----------------|-----|-------------|-------|-------------------|
| 1     | Regression | 1027,906       | 5   | 205,581     | 1,269 | ,284 <sup>b</sup> |
|       | Residual   | 15713,889      | 97  | 161,999     |       |                   |
|       | Total      | 16741,795      | 102 |             |       |                   |

a. Dependent Variable: Percentage of non-perseverative errors

b. Predictors: (Constant), History of decompression illness score, dAge 40-49 years, Hazardous alcohol consumption, Depressive symptoms, dAge 50-59 years

**Coefficients<sup>a</sup>**

| Model |                                        | Unstandardized Coefficients |            | Standardized Coefficients | t      | Sig. | 95,0% Confidence Interval for B |             | Collinearity Statistics |       |
|-------|----------------------------------------|-----------------------------|------------|---------------------------|--------|------|---------------------------------|-------------|-------------------------|-------|
|       |                                        | B                           | Std. Error | Beta                      |        |      | Lower Bound                     | Upper Bound | Tolerance               | VIF   |
| 1     | (Constant)                             | 24,821                      | 2,823      |                           | 8,793  | ,000 | 19,218                          | 30,423      |                         |       |
|       | dAge 40-49 years                       | ,014                        | 3,396      | ,001                      | ,004   | ,997 | -6,725                          | 6,754       | ,580                    | 1,725 |
|       | dAge 50-59 years                       | 3,621                       | 3,517      | ,138                      | 1,030  | ,306 | -3,358                          | 10,601      | ,541                    | 1,850 |
|       | Depressive symptoms                    | -6,672                      | 4,553      | -,148                     | -1,466 | ,146 | -15,709                         | 2,364       | ,951                    | 1,051 |
|       | Hazardous alcohol consumption          | -,077                       | 2,691      | -,003                     | -,029  | ,977 | -5,417                          | 5,262       | ,969                    | 1,033 |
|       | History of decompression illness score | -,458                       | ,275       | -,177                     | -1,664 | ,099 | -1,004                          | ,088        | ,858                    | 1,165 |

a. Dependent Variable: Percentage of non-perseverative errors
