# Supplementary material for: Executive Function among Chilean Shellfish Divers: A Cross-Sectional Study Considering Working and Health Conditions in Artisanal Fishing
Source: Int J Environ Res Public Health. 2021 May 31;18(11):5923. doi: 10.3390/ijerph18115923 (PMC8199200; doi:10.3390/ijerph18115923)
Supplement: Supplementary file 1 [file ijerph-18-05923-s001.zip › Table S3.pdf]

**Table S3: Sensitivity analysis of the linear regression models to assess the severity and frequency of decompression illness as a risk factor for reduced executive functioning among divers using severity and frequency of decompression illness as categorical variable. The models were adjusted for age, depressive symptoms, and hazardous alcohol consumption; N=103 divers with complete data.**

|                                                              | % Perseverative responses |                | % Perseverative errors |               | % Non-perseverative errors |               |
|--------------------------------------------------------------|---------------------------|----------------|------------------------|---------------|----------------------------|---------------|
| Adjusted R <sup>2</sup><br>(p <sub>Anova</sub> )             | 0.155<br>(p=0.001)        |                | 0.156<br>(p=0.001)     |               | 0.007<br>(p=0.364)         |               |
|                                                              | B                         | 95% CI         | B                      | 95% CI        | B                          | 95% CI        |
| <b>Age (years)</b>                                           |                           |                |                        |               |                            |               |
| <40                                                          | 0                         |                | 0                      |               | 0                          |               |
| 40-49                                                        | 13.85                     | -0.13 – 27.83  | 10.68                  | 0.53 – 20.83  | 0.95                       | -6.44 – 8.33  |
| 50-59                                                        | 13.64                     | -0.53 – 27.81  | 10.11                  | -0.18 – 20.40 | 4.89                       | -2.60 – 12.38 |
| <b>Depressive symptoms</b> <sup>1</sup>                      | 11.51                     | -5.59 – 28.60  | 7.88                   | -4.54 – 20.30 | -7.04                      | -16.07 – 2.00 |
| yes vs. no                                                   |                           |                |                        |               |                            |               |
| <b>Hazardous alcohol consumption</b> <sup>2</sup>            | 4.67                      | -5.59 – 14.93  | 3.31                   | -4.14 – 10.76 | -0.08                      | -5.50 – 5.34  |
| yes vs. no                                                   |                           |                |                        |               |                            |               |
| <b>History of decompression illness score</b> <sup>3,4</sup> |                           |                |                        |               |                            |               |
| N (%)                                                        |                           |                |                        |               |                            |               |
| <b>0-1</b>                                                   | 0                         |                | 0                      |               | 0                          |               |
| 33 (32.0)                                                    |                           |                |                        |               |                            |               |
| <b>2</b>                                                     | -2.05                     | -16.66 – 12.57 | -1.58                  | -12.19 – 9.04 | -2.73                      | -10.46 – 4.99 |
| 23 (22.3)                                                    |                           |                |                        |               |                            |               |
| <b>3 – 8</b>                                                 | 13.96                     | -0.34 – 28.26  | 10.53                  | 0.15 – 20.92  | -6.21                      | -13.77 – 1.35 |
| 22 (21.4)                                                    |                           |                |                        |               |                            |               |
| <b>≥ 9</b>                                                   | 16.20                     | 1.98 – 30.42   | 11.38                  | 1.05 – 21.70  | -6.82                      | -14.34 – 0.70 |
| 25 (24.3)                                                    |                           |                |                        |               |                            |               |

<sup>1</sup> Anhedonia or low mood “more than half the days” in the last two weeks. <sup>2</sup> AUDIT-C questionnaire score ≥5. <sup>3</sup> Score (in categories) of self-reported history of decompression illness according to severity and frequency of symptoms. Missing n= 1. <sup>4</sup> Comparison of medians of WCST (Kruskal-Wallis Test), median (min – max): (1) Percentages of perseverative responses: p <0.01, score 0 – 1= 18 (3 – 88), score 2= 20 (12 – 98), score 3 – 8= 29.5 (8 – 98), score ≥ 9= 32 (8 – 98). (2) Percentage of perseverative errors: p <0.01, score 0 – 1= 16 (3 – 66), score 2= 18 (12 – 73), score 3 – 8= 26.5 (7 – 73), score ≥ 9= 26 (8 – 73). (3) Percentage of non-perseverative errors: p= 0.18, score 0 – 1= 26 (4 – 66), score 2= 25 (2 – 38), score 3 – 8= 18.4 (2 – 59), score ≥ 9= 20 (2 – 58).
