# Supplementary material for: Executive Function among Chilean Shellfish Divers: A Cross-Sectional Study Considering Working and Health Conditions in Artisanal Fishing
Source: Int J Environ Res Public Health. 2021 May 31;18(11):5923. doi: 10.3390/ijerph18115923 (PMC8199200; doi:10.3390/ijerph18115923)
Supplement: Supplementary file 1 [file ijerph-18-05923-s001.zip › Table S4.pdf]

**Table S4: Sensitivity analysis of the linear regression models to assess the severity and frequency of decompression illness as a risk factor for reduced executive functioning including fishermen.**  
**The models were adjusted for age, depressive symptoms, and hazardous alcohol consumption;**  
**N= 161.**

|                                                            | % Perseverative responses |               | % Perseverative errors |               | % Non-perseverative errors |               |
|------------------------------------------------------------|---------------------------|---------------|------------------------|---------------|----------------------------|---------------|
| Adjusted R <sup>2</sup><br>(p <sub>Anova</sub> )           | 0.140<br>(p=0.000)        |               | 0.138<br>(p=0.000)     |               | 0.003<br>(p=0.360)         |               |
|                                                            | B                         | 95% CI        | B                      | 95% CI        | B                          | 95% CI        |
| <b>Age (years)</b>                                         |                           |               |                        |               |                            |               |
| <40                                                        | 0                         |               | 0                      |               | 0                          |               |
| 40-49                                                      | 12.30                     | 2.74 – 21.86  | 9.48                   | 2.49 – 16.47  | 0.18                       | -4.75– 5.12   |
| 50-59                                                      | 14.03                     | 4.11 – 23.95  | 10.55                  | 3.29 – 17.80  | 2.21                       | -2.91 – 7.33  |
| <b>Depressive symptoms</b> <sup>1</sup>                    | 15.74                     | 4.88 – 26.59  | 11.35                  | 3.41 – 19.29  | -5.15                      | -10.76 – 0.45 |
| yes vs. no                                                 |                           |               |                        |               |                            |               |
| <b>Hazardous alcohol consumption</b> <sup>2</sup>          | 6.57                      | -1.26 – 14.41 | 4.83                   | -0.90 – 10.55 | -1.74                      | -5.78– 2.30   |
| yes vs. no                                                 |                           |               |                        |               |                            |               |
| <b>History of decompression illness score</b> <sup>3</sup> | 0.86                      | 0.02 – 1.70   | 0.58                   | 0.04 – 1.19   | -0.23                      | -0.67 – 0.20  |

<sup>1</sup> Anhedonia or low mood “more than half the days” in the last two weeks. <sup>2</sup> AUDIT-C questionnaire score ≥5. <sup>3</sup> Score of self-reported history of decompression illness according to severity and frequency of symptoms. Missing n= 1.
