# Supplementary material for: Executive Function among Chilean Shellfish Divers: A Cross-Sectional Study Considering Working and Health Conditions in Artisanal Fishing
Source: Int J Environ Res Public Health. 2021 May 31;18(11):5923. doi: 10.3390/ijerph18115923 (PMC8199200; doi:10.3390/ijerph18115923)
Supplement: Supplementary file 1 [file ijerph-18-05923-s001.zip › Table S5.pdf]

**Table S5: Linear regression models to assess the severity and frequency of decompression illness as a risk factor for reduced executive functioning among divers. The models were adjusted for age, educational level, and depressive symptoms; N=103 divers with complete data.**

|                                                            | % Perseverative responses |               | % Perseverative errors |               | % Non-perseverative errors |               |
|------------------------------------------------------------|---------------------------|---------------|------------------------|---------------|----------------------------|---------------|
| Adjusted R <sup>2</sup><br>(p)                             | 0.253<br>(p=0.000)        |               | 0.237<br>(p=0.000)     |               | 0.032<br>(p=0.166)         |               |
|                                                            | B                         | 95% CI        | B                      | 95% CI        | B                          | 95% CI        |
| <b>Age (years)</b>                                         |                           |               |                        |               |                            |               |
| <40                                                        | 0                         |               | 0                      |               | 0                          |               |
| 40-49                                                      | 9.58                      | -2.42 – 21.58 | 7.74                   | -1.07 – 16.55 | 0.72                       | -5.95 – 7.38  |
| 50-59                                                      | 10.29                     | -2.29 – 22.86 | 7.87                   | -1.36 – 17.10 | 4.17                       | -2.81 – 11.14 |
| <b>Educational level</b>                                   |                           |               |                        |               |                            |               |
| Complete secondary & superior                              | 0                         |               | 0                      |               | 0                          |               |
| Complete primary & incomplete secondary                    | 1.36                      | -8.91 – 11.62 | 1.08                   | -6.46 – 8.61  | 1.48                       | -4.21 – 7.18  |
| Incomplete primary                                         | 23.74                     | 11.34 – 36.15 | 16.39                  | 7.28 – 25.49  | -4.26                      | -11.15 – 2.63 |
| <b>Depressive symptoms</b> <sup>1</sup>                    | 9.42                      | -6.75 – 25.58 | 6.53                   | -5.34 – 18.40 | -6.17                      | -15.15 – 2.80 |
| yes vs. no                                                 |                           |               |                        |               |                            |               |
| <b>History of decompression illness score</b> <sup>2</sup> | 1.10                      | 0.13 – 2.07   | 0.78                   | 0.06 – 1.49   | -0.41                      | -0.95 – 0.13  |

<sup>1</sup> Anhedonia or low mood “more than half the days” in the last two weeks. <sup>2</sup> Score of self-reported history of decompression illness according to severity and frequency of symptoms. Missing n= 1.
